# Supplementary material
Source: PubMed Central journal article supplement (PMC5654688)
Supplement: NIHMS911008-supplement-supplement_1.pdf [file NIHMS911008-supplement-supplement_1.pdf]

**Supplementary Table.** Incidence rates of clinical outcomes per 100 person-years according to tertiles of serum SAA concentrations

| SAA Tertiles | ESRD                    |                                 | All-Cause Mortality     |                                 |
|--------------|-------------------------|---------------------------------|-------------------------|---------------------------------|
|              | Events/<br>Person-Years | Incidence (95% CI) <sup>a</sup> | Events/<br>Person-Years | Incidence (95% CI) <sup>a</sup> |
| 1            | 28 / 1073               | 2.6 (3.6 -1.7)                  | 47/1237                 | 3.8 (4.9-2.7)                   |
| 2            | 20 / 1329               | 1.5 (2.2 -0.9)                  | 38/1446                 | 2.6 (3.5-1.8)                   |
| 3            | 27/1307                 | 2.1 (2.8-1.3)                   | 39/1466                 | 2.7 (3.5-1.8)                   |

<sup>a</sup>per 100 person-years

Range of SAA concentrations in each tertile are; tertile 1 < 0.937 mg/mL; tertile 2, ≥0.937 - <1.62 mg/L; tertile 3 ≥1.62 mg/L.
